# Supplementary material for: Prognostic Value of Lactate Dehydrogenase in Patients with Hepatocellular Carcinoma: A Meta-Analysis
Source: Hindawi journal article supplement (doi:10.1155/2018/1723184), 2018-12-27

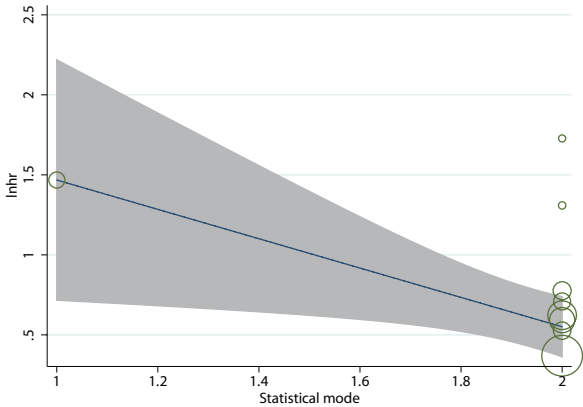

Supplement: f3 [file 1723184.f3.pdf]
